# Supplementary material for: Mercury Exposure and Antinuclear Antibodies among Females of Reproductive Age in the United States: NHANES
Source: Environ Health Perspect. 2015 Feb 10;123(8):792–8. doi: 10.1289/ehp.1408751 (PMC4529012; doi:10.1289/ehp.1408751)
Supplement: (244 KB) PDF [file ehp.1408751.s001.508.pdf]

**Supplemental Material**

**Mercury Exposure and Antinuclear Antibodies among Females of  
Reproductive Age in the United States: NHANES**

Emily C. Somers, Martha A. Ganser, Jeffrey S. Warren, Niladri Basu, Lu Wang, Suzanna M.  
Zick, and Sung Kyun Park

**Table S1.** Association between mercury exposure and ANA positivity among females 16-49 years in the general US population (NHANES), with adjustment for polychlorinated biphenyls (PCBs).

| <b>Mercury exposure</b>                       | <b>ANA positive<br/>n (%)<sup>a</sup></b> | <b>Crude Model<sup>b</sup><br/>OR (95% CI)</b> | <b>Coplanar PCBs<sup>c,d</sup><br/>OR (95% CI)</b> | <b>Prevalent PCBs<sup>c,e</sup><br/>OR (95% CI)</b> |
|-----------------------------------------------|-------------------------------------------|------------------------------------------------|----------------------------------------------------|-----------------------------------------------------|
| <b>Hair mercury (ppm)<sup>f</sup></b>         |                                           |                                                |                                                    |                                                     |
| Tertile 1 (<0.11)                             | 13 (8)                                    | 1.00 (referent)                                | 1.00 (referent)                                    | 1.00 (referent)                                     |
| Tertile 2 (0.11-0.27)                         | 22 (13)                                   | 1.61 (0.27, 9.64)                              | 2.71 (0.54, 13.55)                                 | 2.65 (0.57, 12.30)                                  |
| Tertile 3 (0.271-5.96)                        | 20 (15)                                   | 1.96 (0.57, 6.77)                              | 4.44 (1.60, 12.28)                                 | 4.03 (1.65, 9.84)                                   |
| <b>Total blood mercury (µg/L)<sup>g</sup></b> |                                           |                                                |                                                    |                                                     |
| Quartile 1 (<0.4)                             | 27 (9)                                    | 1.00 (referent)                                | 1.00 (referent)                                    | 1.00 (referent)                                     |
| Quartile 2 (0.4-0.8)                          | 67 (21)                                   | 2.52 (1.16, 5.47)                              | 2.70 (1.29, 5.67)                                  | 2.30 (1.11, 4.78)                                   |
| Quartile 3 (0.9-1.5)                          | 50 (17)                                   | 2.04 (0.95, 4.39)                              | 2.43 (1.12, 5.27)                                  | 2.07 (0.97, 4.42)                                   |
| Quartile 4 (1.6-32.8)                         | 61 (18)                                   | 2.10 (0.98, 4.50)                              | 2.71 (1.25, 5.86)                                  | 2.33 (1.09, 4.98)                                   |

Abbreviations: ANA, antinuclear antibody; PCBs, polychlorinated biphenyls; Hg, mercury; NHANES, National Health and Nutrition Examination Survey; OR, odds ratio.

<sup>a</sup>Weighted percent. <sup>b</sup>Models include subset with available PCB data (samples size reduced by ~6% compared to main analyses). <sup>c</sup>Adjusted for age, race/ethnicity, education, serum cotinine, selenium, omega-3 fatty acids, and an indicator for NHANES cycle for models combining data across cycles (1999-2004). <sup>d</sup>Coplanar (dioxin-like) PCB congeners included PCBs (81, 105, 118, 126, 156, 157, 167, 169); a summary measure was calculated as the sum of the products of the concentration of each serum lipid-adjusted congener and its corresponding toxic equivalency factor (TEF), which was then log-transformed. <sup>e</sup>The Prevalent PCB measure is the log-transformed sum of the lipid-adjusted values for the four most prevalent PCB congeners (PCBs 118, 138, 153, 180), three of which are non-coplanar and without defined TEFs to take into account. <sup>f</sup>NHANES 1999-2000, 1 cycle (n=424). <sup>g</sup>NHANES 1999-2004, 3 cycles (n=1281).

**Table S2.** Association between mercury exposure and ANA titer strength, among females 16-49 years in the general US population (NHANES), based on multinomial logistic regression modeling.

| <b>Mercury exposure</b>                       | <b>ANA positive<br/>n (%)<sup>a</sup></b> | <b>Crude Model<br/>OR (95% CI)</b> | <b>Model A<sup>b</sup><br/>OR (95% CI)</b> | <b>Model B<sup>c</sup><br/>OR (95% CI)</b> | <b>Model C<sup>d</sup><br/>OR (95% CI)</b> |
|-----------------------------------------------|-------------------------------------------|------------------------------------|--------------------------------------------|--------------------------------------------|--------------------------------------------|
| <b>Hair mercury (ppm)<sup>e</sup></b>         |                                           |                                    |                                            |                                            |                                            |
| <b>ANA negative (n=396)</b>                   | NA                                        | NA                                 | NA                                         | NA                                         | NA                                         |
| <b>ANA 1:80-1:640 (n=32)</b>                  |                                           |                                    |                                            |                                            |                                            |
| Tertile 1 (<0.11)                             | 11 (7)                                    | 1.00 (referent)                    | 1.00 (referent)                            | 1.00 (referent)                            | 1.00 (referent)                            |
| Tertile 2 (0.11-0.27)                         | 9 (2)                                     | 0.23 (0.03, 2.04)                  | 0.23 (0.04, 1.32)                          | 0.24 (0.04, 1.38)                          | 0.20 (0.02, 1.64)                          |
| Tertile 3 (0.271-5.96)                        | 12 (6)                                    | 0.82 (0.40, 1.69)                  | 2.93 (1.22, 7.06)                          | 2.98 (1.29, 6.90)                          | 2.11 (0.73, 6.15)                          |
| <b>ANA ≥1:1280 (n=24)</b>                     |                                           |                                    |                                            |                                            |                                            |
| Tertile 1 (<0.11)                             | 3 (1)                                     | 1.00 (referent)                    | 1.00 (referent)                            | 1.00 (referent)                            | 1.00 (referent)                            |
| Tertile 2 (0.11-0.27)                         | 13 (11)                                   | 11.81 (0.98, 142.86)               | 13.74 (1.09, 172.78)                       | 16.69 (1.63, 171.23)                       | 14.29 (1.02, 200.25)                       |
| Tertile 3 (0.271-5.96)                        | 8 (8)                                     | 9.47 (1.43, 62.60)                 | 11.14 (1.53, 81.36)                        | 11.41 (1.60, 81.23)                        | 12.57 (1.36, 116.44)                       |
| <b>Total blood mercury (µg/L)<sup>f</sup></b> |                                           |                                    |                                            |                                            |                                            |
| <b>ANA negative (n=1139)</b>                  | NA                                        | NA                                 | NA                                         | NA                                         | NA                                         |
| <b>ANA 1:80-1:640 (n=109)</b>                 |                                           |                                    |                                            |                                            |                                            |
| Quartile 1 (<0.4)                             | 20 (8)                                    | 1.00 (referent)                    | 1.00 (referent)                            | 1.00 (referent)                            | 1.00 (referent)                            |
| Quartile 2 (0.4-0.8)                          | 40 (11)                                   | 1.55 (0.66, 3.62)                  | 1.61 (0.64, 4.10)                          | 1.62 (0.64, 4.09)                          | 1.63 (0.59, 4.55)                          |
| Quartile 3 (0.9-1.5)                          | 23 (8)                                    | 1.06 (0.46, 2.42)                  | 1.37 (0.56, 3.38)                          | 1.39 (0.57, 3.36)                          | 1.27 (0.45, 3.55)                          |
| Quartile 4 (1.6-32.8)                         | 26 (6)                                    | 0.82 (0.40, 1.70)                  | 1.10 (0.45, 2.70)                          | 1.11 (0.46, 2.69)                          | 1.09 (0.35, 3.41)                          |
| <b>ANA ≥1:1280 (n=104)</b>                    |                                           |                                    |                                            |                                            |                                            |
| Quartile 1 (<0.4)                             | 10 (2)                                    | 1.00 (referent)                    | 1.00 (referent)                            | 1.00 (referent)                            | 1.00 (referent)                            |
| Quartile 2 (0.4-0.8)                          | 31 (9)                                    | 4.70 (1.30, 16.98)                 | 4.23 (1.10, 16.24)                         | 4.20 (1.09, 16.24)                         | 4.42 (1.15, 16.99)                         |
| Quartile 3 (0.9-1.5)                          | 28 (8)                                    | 4.35 (1.27, 14.82)                 | 4.21 (1.18, 15.09)                         | 4.13 (1.15, 14.80)                         | 4.57 (1.26, 16.60)                         |
| Quartile 4 (1.6-32.8)                         | 35 (11)                                   | 5.91 (1.70, 20.56)                 | 6.04 (1.59, 22.86)                         | 5.93 (1.57, 22.47)                         | 6.17 (1.61, 23.70)                         |

Abbreviations: ANA, antinuclear antibody; Hg, mercury; NHANES, National Health and Nutrition Examination Survey; OR, odds ratio

<sup>a</sup>Weighted percent. <sup>b</sup>Adjusted for age, race/ethnicity, education, serum cotinine, selenium, and an indicator for NHANES cycle for multi-cycle models. <sup>c</sup>Model A + further adjusted for omega-3 fatty acids. <sup>d</sup>Model A + further adjusted for total seafood intake. <sup>e</sup>NHANES 1999-2000, 1 cycle (n=452). <sup>f</sup>NHANES 1999-2004, 3 cycles (n=1352).
